# Supplementary material
Source: Springer Nature journal article supplement (https://www.springerprofessional.de/resource/supplementary/13673_2013_37_MOESM9_ESM.pdf/11899364)

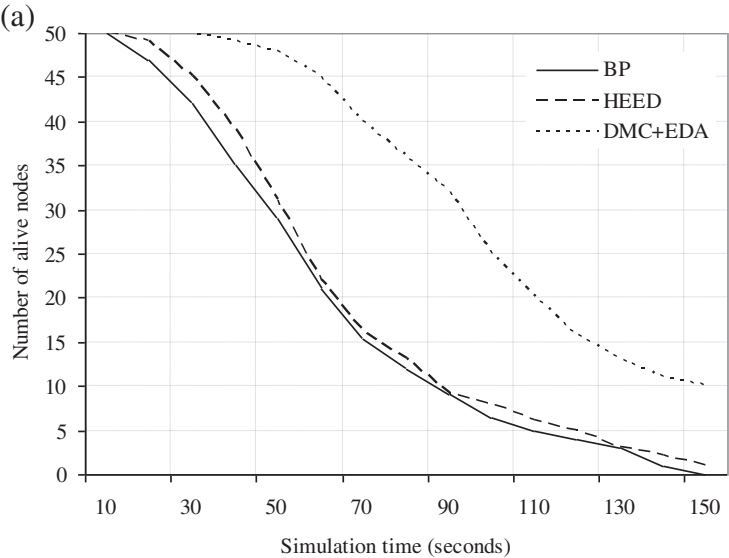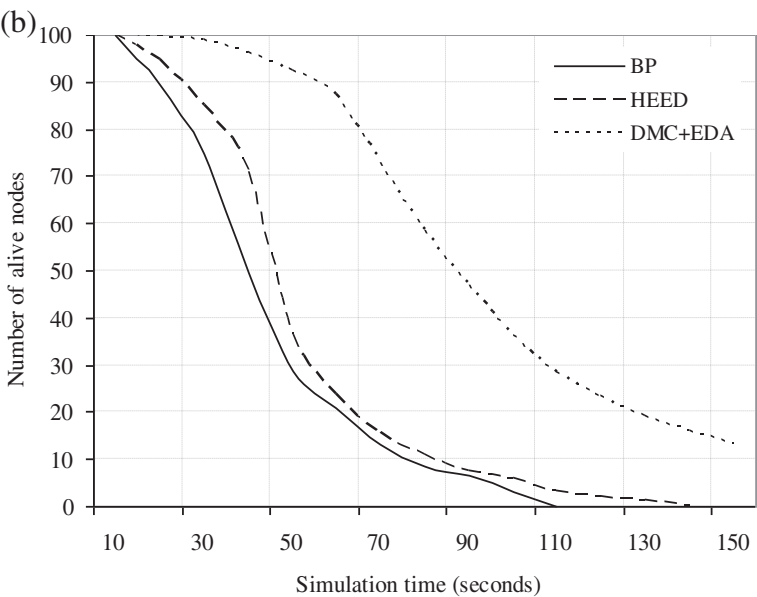

Supplement: MOESM9 [file 11899364]
